# Supplementary material for: Inference of hierarchical regulatory network of estrogen-dependent breast cancer through ChIP-based data
Source: Springer Nature journal article supplement (doi:10.1186/1752-0509-4-170), 2010-12-01
Supplement: 12918_2010_581_MOESM18_ESM.pdf [file 12918_2010_581_MOESM18_ESM.pdf]

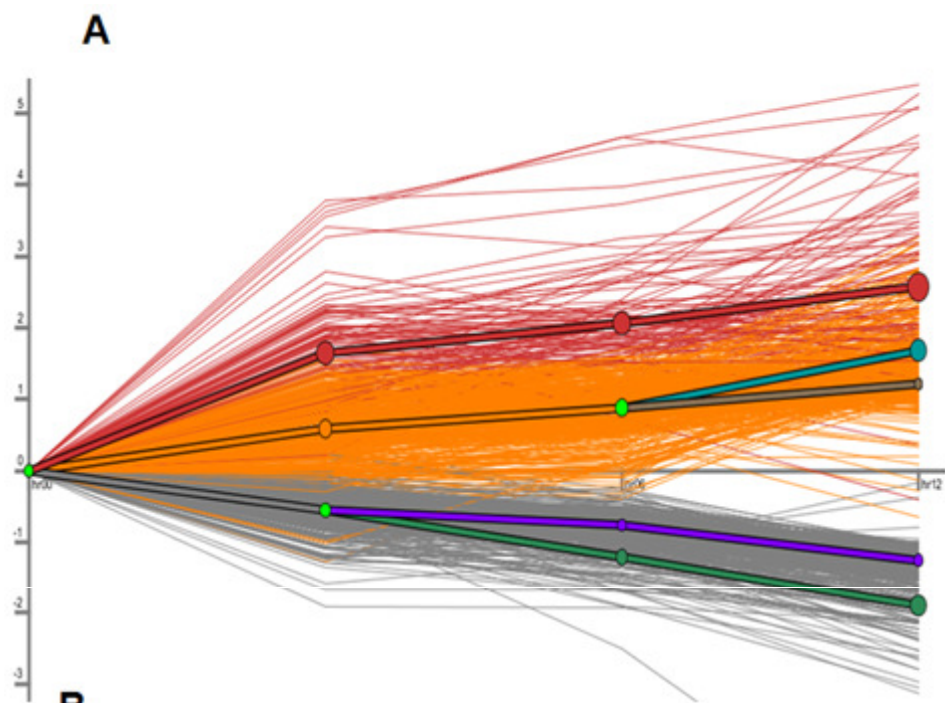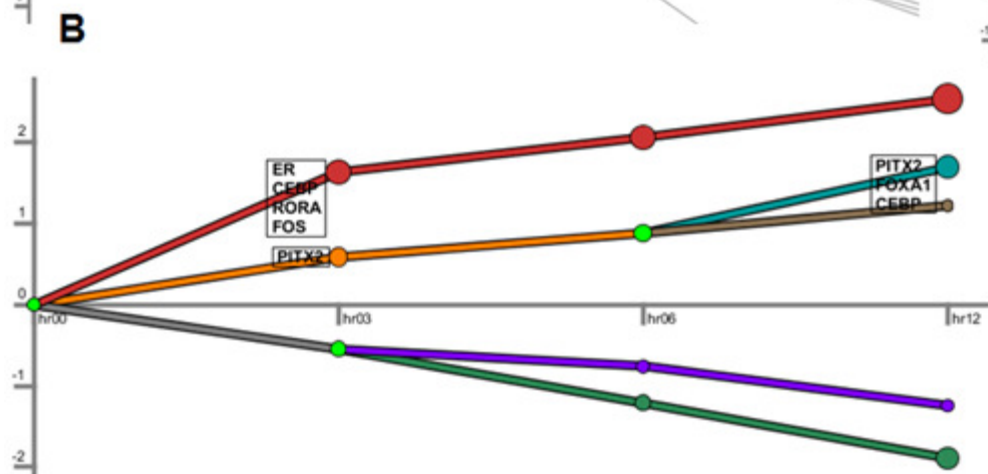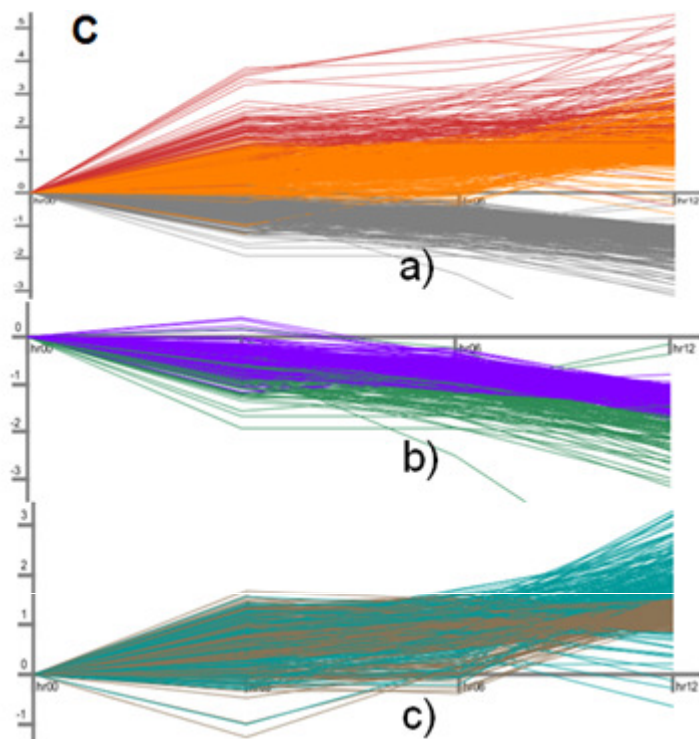

**Lyase activity**  $6.9 \times 10^{-3}$

**Chromosome**  $5.5 \times 10^{-7}$

mRNA metabolic process  $1 \times 10^{-10}$

ribonucleoprotein complex  $6.7 \times 10^{-8}$

mRNA processing  $4.9 \times 10^{-10}$

RNA splicing  $1.1 \times 10^{-9}$

**lytic vacuole, lysosome**  $7.8 \times 10^{-5}$

**Response to virus**  $4.3 \times 10^{-3}$
