# Supplementary material for: Inference of hierarchical regulatory network of estrogen-dependent breast cancer through ChIP-based data
Source: Springer Nature journal article supplement (doi:10.1186/1752-0509-4-170), 2010-12-01

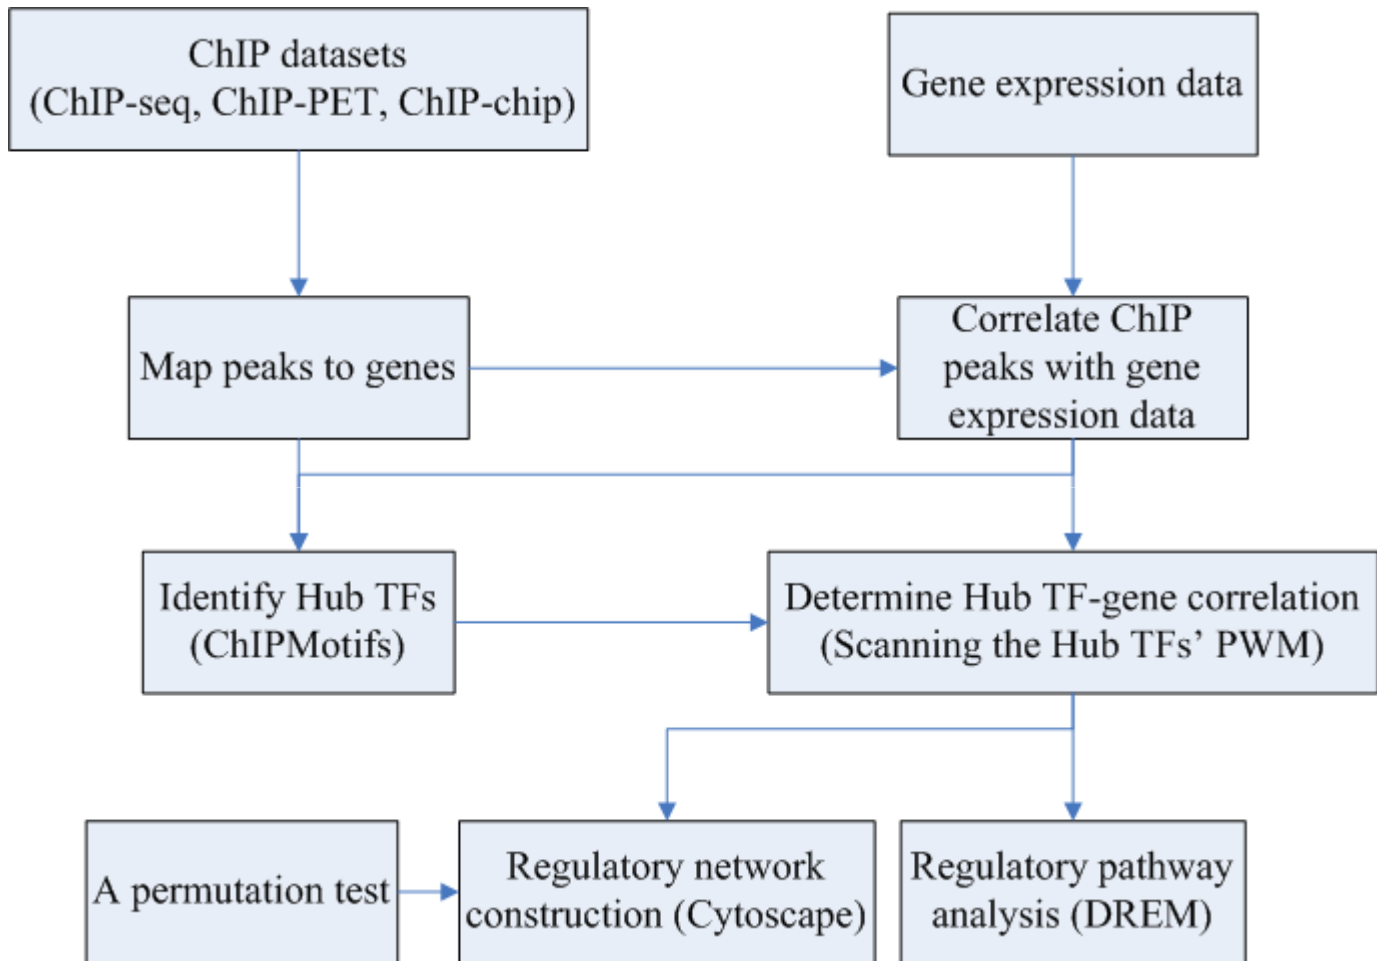

Supplement: 12918_2010_581_MOESM21_ESM.pdf [file 12918_2010_581_MOESM21_ESM.pdf]
